# Supplementary material for: Catalytic centers with multiple oxidation states: a strategy for breaking the overpotential ceiling from the linear scaling relation in oxygen evolution
Source: Royal Society of Chemistry journal article supplement (doi:10.1039/d2ta05409d), 2022-01-01
Supplement: d2ta05409d1.pdf [file d2ta05409d1.pdf]

## **Supporting Information**

### **Catalytic Centers with Multiple Oxidation States: A Strategy for Breaking the Overpotential Ceiling from the Linear Scaling Relation in Oxygen Evolution**

Ungsoo Kim,<sup>a</sup> Jinhong Mun,<sup>b</sup> Donghwan Koo,<sup>a</sup> Jihyung Seo,<sup>a</sup> Yunseong Choi,<sup>a</sup> Geunsik Lee,<sup>\*b</sup> and Hyesung Park<sup>\*a</sup>

<sup>a</sup>Department of Materials Science and Engineering, Graduate School of Semiconductor Materials and Devices Engineering, Perovtronics Research Center, Low Dimensional Carbon Materials Center, Ulsan National Institute of Science and Technology, Ulsan 44919, Republic of Korea

<sup>b</sup>Department of Chemistry, Center for Superfunctional Materials, Ulsan National Institute of Science and Technology (UNIST), Ulsan 44919, Republic of Korea

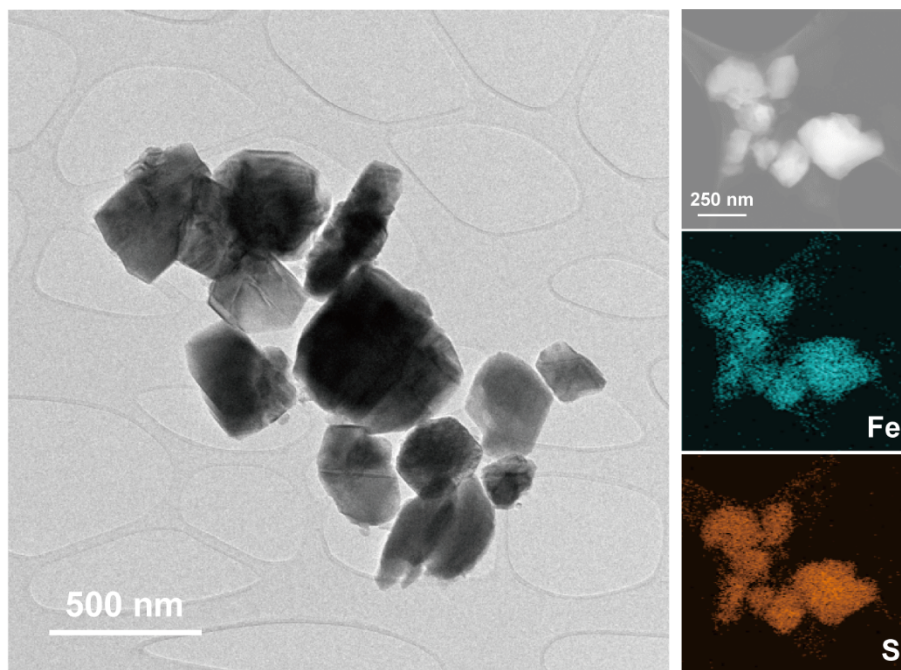

**Fig. S1** Transmission electron microscopy and element mapping images of  $\text{FeS}_2$ .

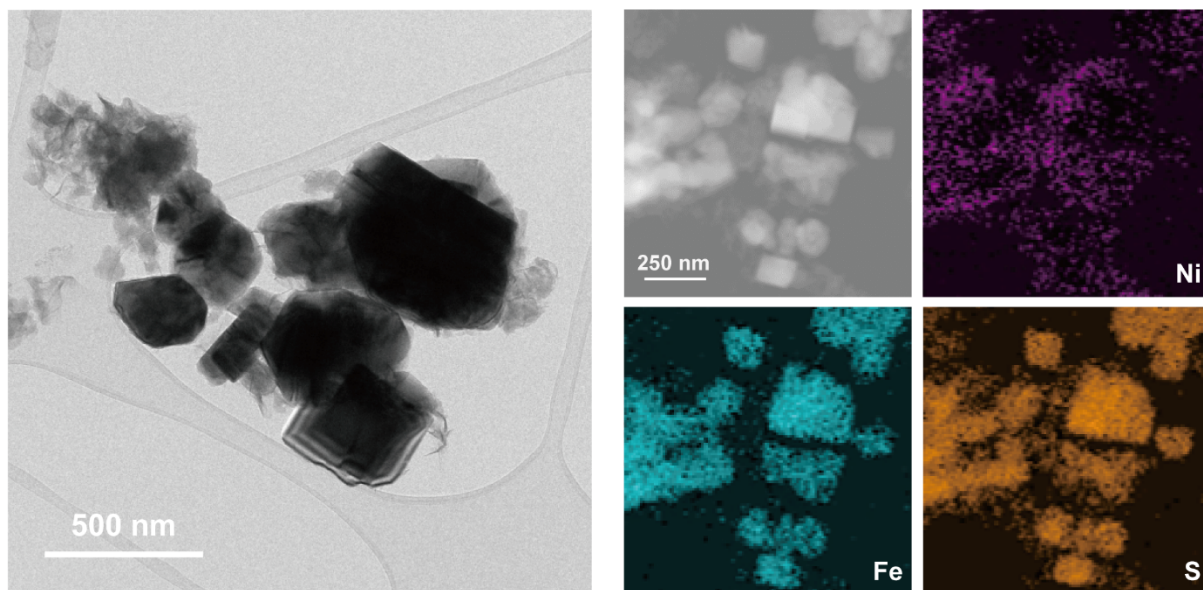

**Fig. S2** Transmission electron microscopy and element mapping images of  $\text{NiFeS}_2$ .

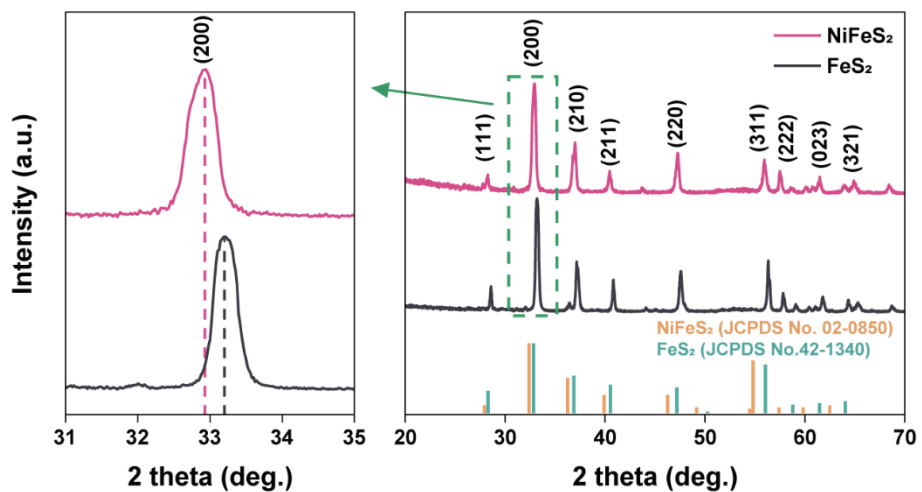

**Fig. S3** X-ray diffraction patterns of FeS<sub>2</sub> and NiFeS<sub>2</sub>.

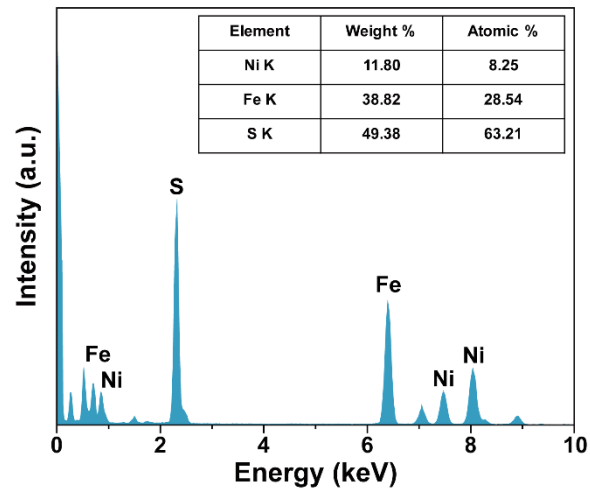

**Fig. S4** Transmission electron microscopy-energy-dispersive X-ray spectrum of NiFeS<sub>2</sub> corresponding to Fig. S2. Inset: weights and atomic ratios of Ni, Fe, and S.

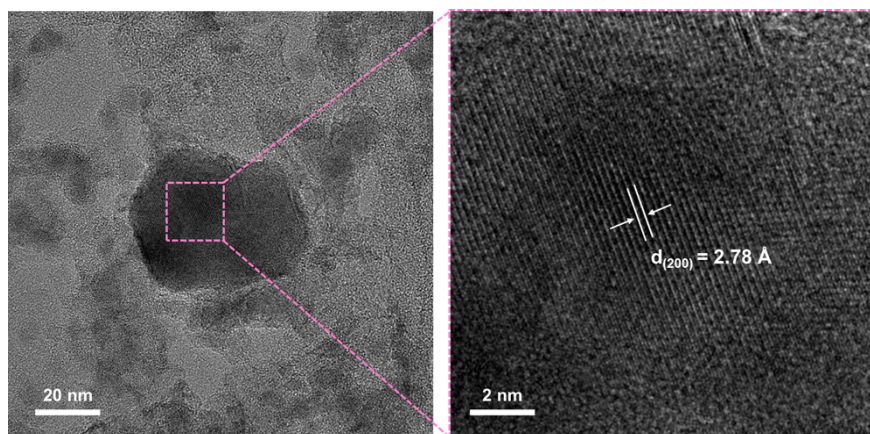

**Fig. S5** High-resolution transmission electron microscopy image of NiFeS<sub>2</sub> in multiple-oxidation-state NiFe catalyst (MOS NiFe). Magnified image shows the lattice fringe of NiFeS<sub>2</sub>.

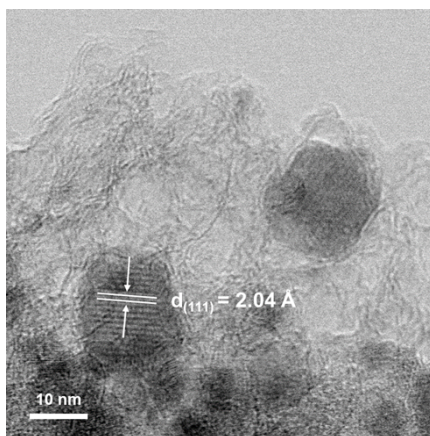

**Fig. S6** High-resolution transmission electron microscopy image of Ni NPs in multiple-oxidation-state NiFe catalyst (MOS NiFe).

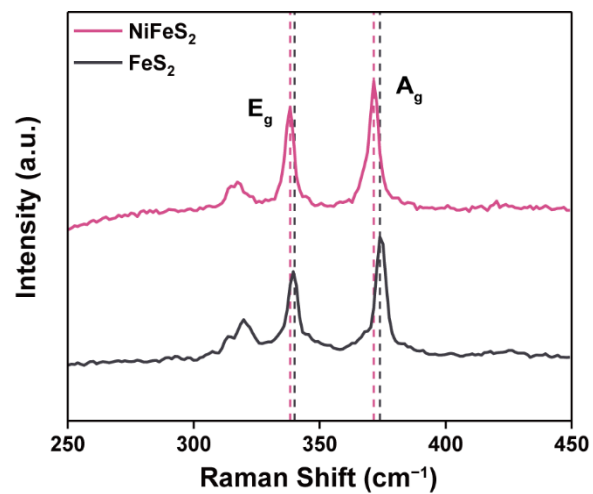

**Fig. S7** Raman spectra of FeS<sub>2</sub> and NiFeS<sub>2</sub>.



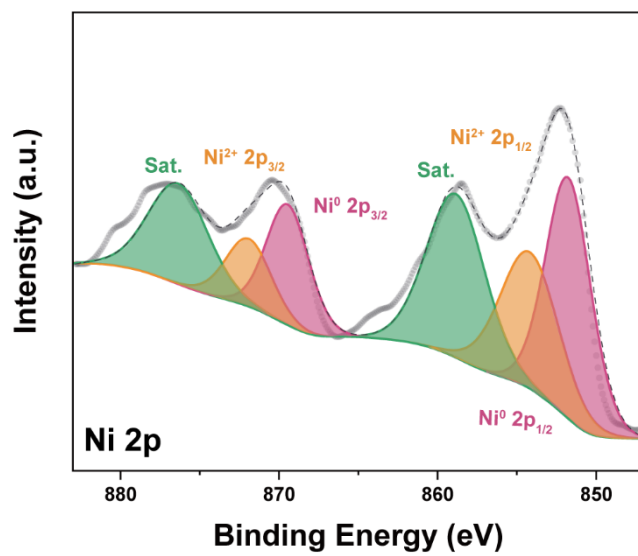

**Fig. S8** High-resolution X-ray photoelectron spectroscopy spectrum of Ni 2p for Ni anchored on the carbon support (NiC).

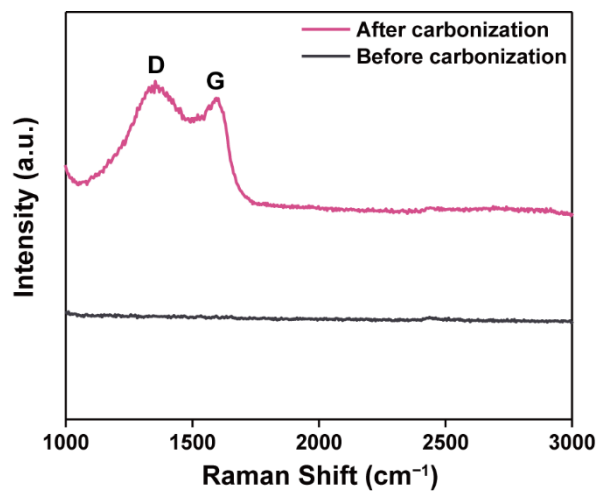

**Fig. S9** Raman spectra of NiFeS<sub>2</sub> (before carbonization) and the multiple-oxidation-state NiFe catalyst (MOS NiFe) (after carbonization).

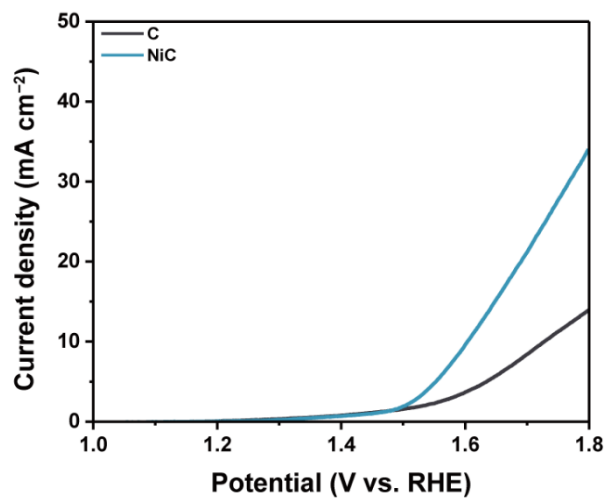

**Fig. S10** Oxygen evolution reaction performance of Ni anchored on the carbon support (NiC).

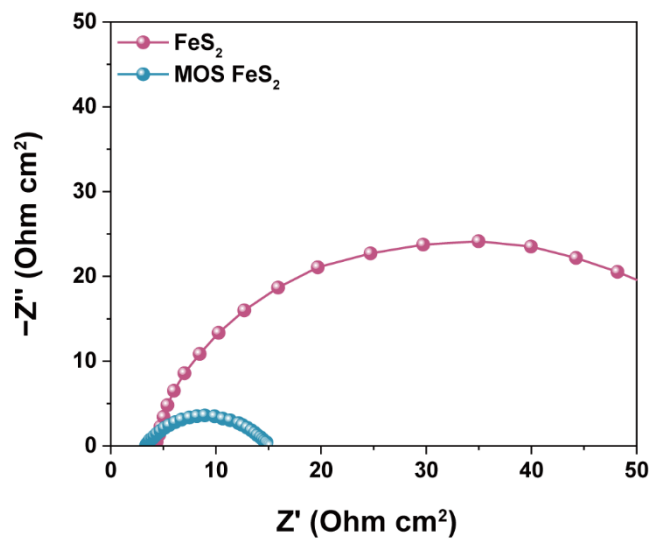

**Fig. S11** Nyquist plots for  $\text{FeS}_2$  and multiple-oxidation-state  $\text{FeS}_2$ .

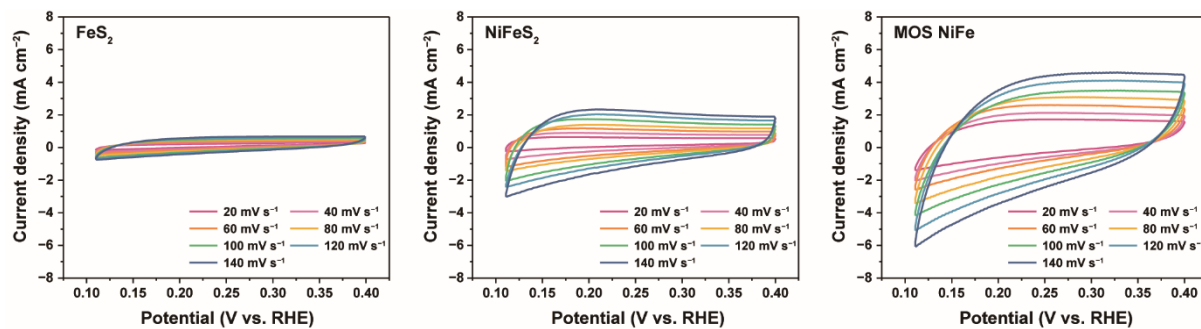

**Fig. S12** Cyclic voltammetry (CV) curves at different scan rates for FeS<sub>2</sub>, NiFeS<sub>2</sub>, and the multiple-oxidation-state NiFe catalyst (MOS NiFe). The anodic and cathodic current densities were obtained at a potential of 0.3 V.

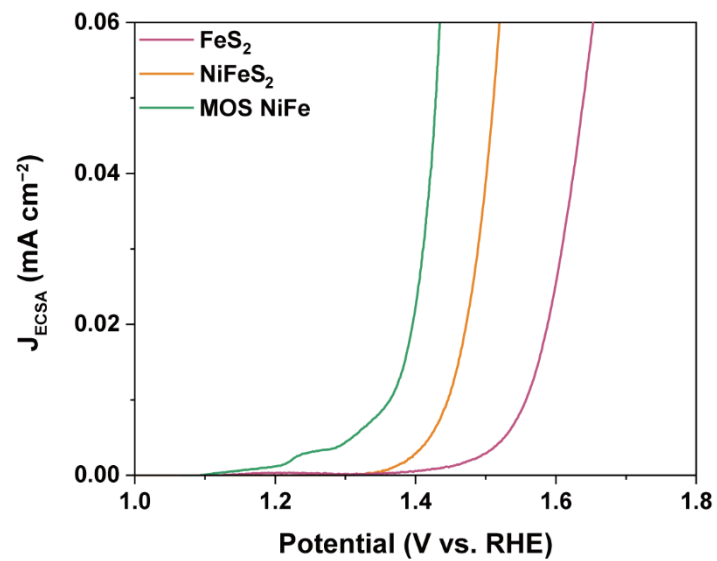

**Fig. S13** Polarization curves normalized to electrochemical active surface area for FeS<sub>2</sub>, NiFeS<sub>2</sub>, and the multiple-oxidation-state NiFe catalyst.

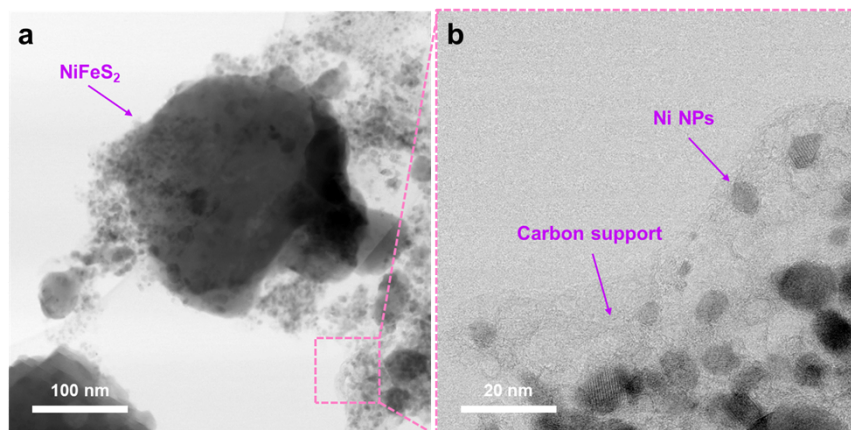

**Fig. S14** (a) High-resolution transmission electron microscopy (HR-TEM) image of the multiple-oxidation-state NiFe catalyst (MOS NiFe). (b) Magnified HR-TEM image taken from the marked region in (a). These images were obtained after the chronopotentiometry stability test operated at different current densities for up to 60 h.

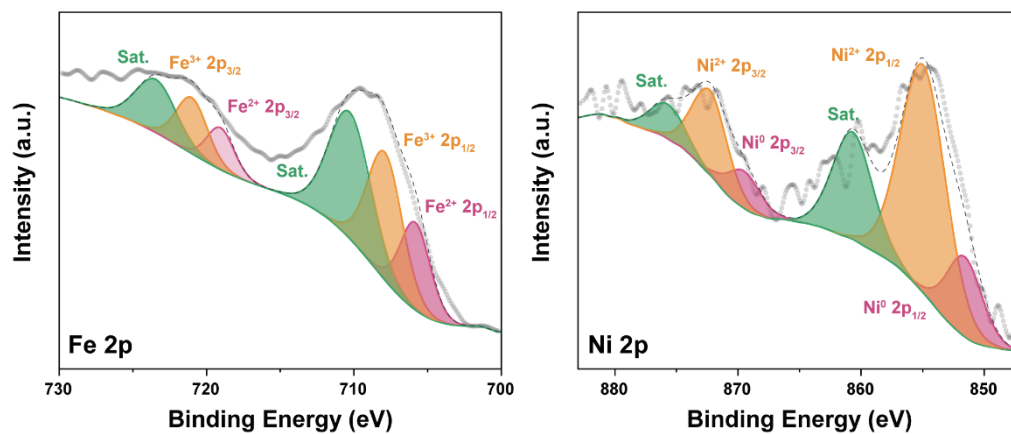

**Fig. S15** High-resolution X-ray photoelectron spectroscopy spectra of Fe 2p and Ni 2p for the multiple-oxidation-state NiFe catalyst (MOS NiFe) after the chronopotentiometry stability test operated at different current densities for up to 60 h.



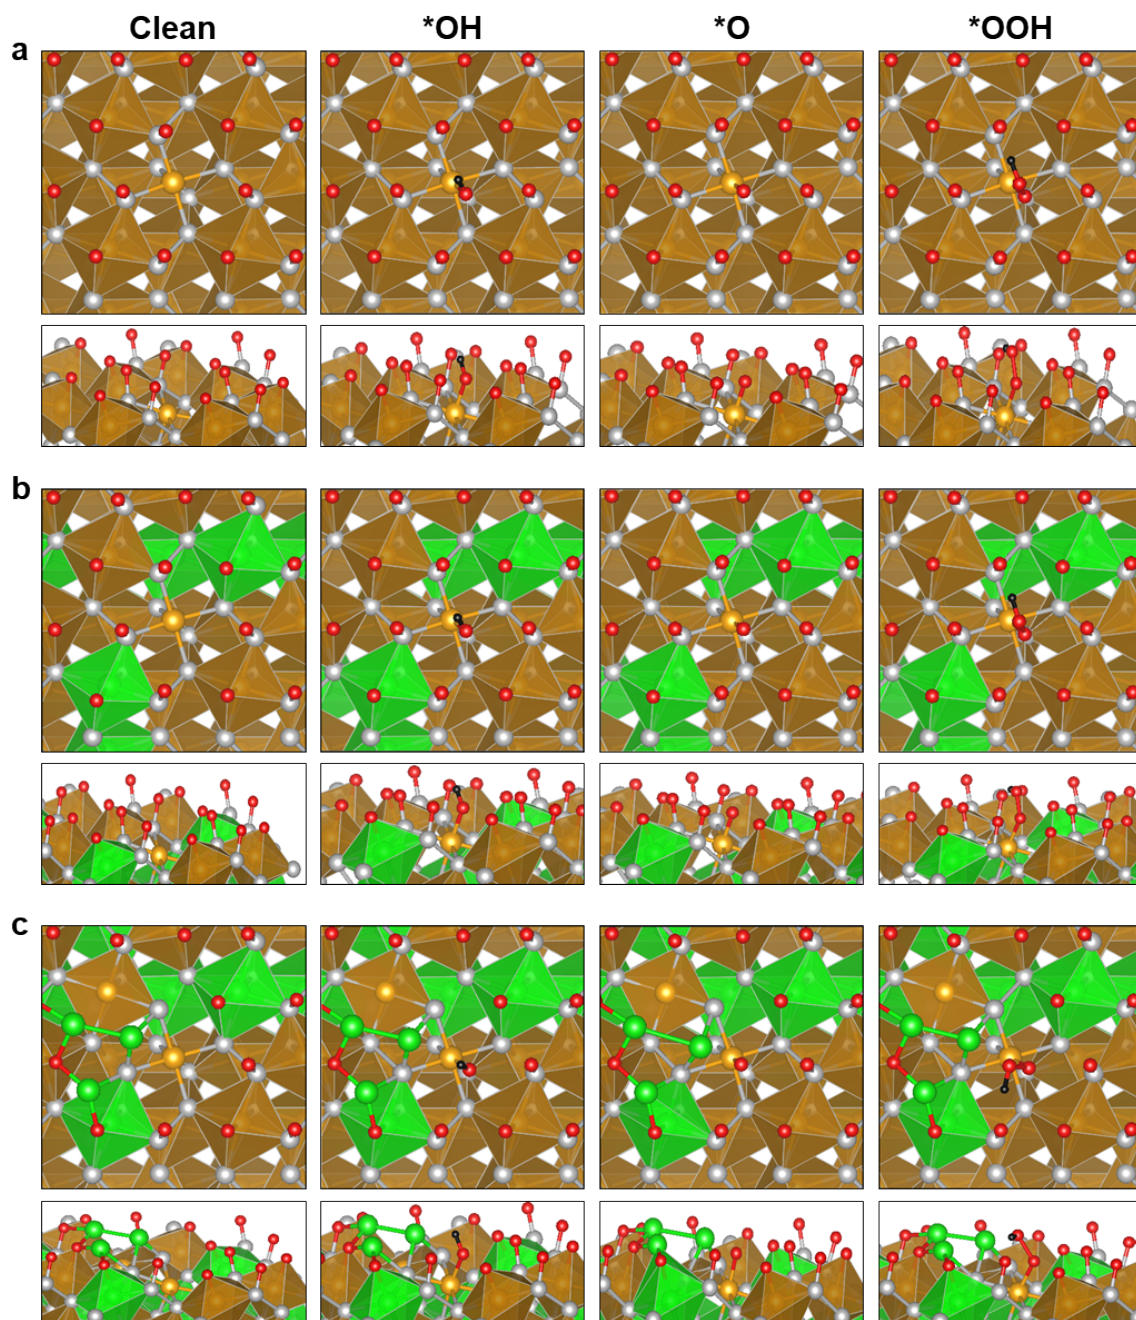

**Fig. S16** Optimized structures of each intermediate on the surface layer of (a)  $\text{FeS}_2$ , (b)  $\text{NiFeS}_2$ , and (c) the multiple-oxidation-state NiFe catalyst (MOS NiFe). The colors indicate the following elements: iron (orange), nickel (green), sulfur (gray), oxygen (red), and hydrogen (black).

**Table S1.** Comparison of the oxygen evolution reaction performance of the multiple-oxidation-state NiFe catalyst (MOS NiFe) with state-of-the-art Ni- and Fe-based electrocatalysts.

| Catalyst                                                | Electrolyte      | $\eta$ at 10 mA $\text{cm}^{-2}$ (mV) | Tafel slope ( $\text{mV dec}^{-1}$ ) | Ref.             |
|---------------------------------------------------------|------------------|---------------------------------------|--------------------------------------|------------------|
| <b>MOS NiFe</b>                                         | <b>1.0 M KOH</b> | <b>160</b>                            | <b>53</b>                            | <b>This work</b> |
| NiFe-OH-F-SR                                            | 1.0 M KOH        | 176                                   | 22.6                                 | 1                |
| CS-NiFeCu                                               | 1.0 M KOH        | 180                                   | 33                                   | 2                |
| a-LNF (t-d)                                             | 1.0 M KOH        | 183                                   | 36                                   | 3                |
| CoFe@NiFe-200/NF                                        | 1.0 M KOH        | 190                                   | 45.71                                | 4                |
| Ni <sub>0.8</sub> Fe <sub>0.2</sub> -AHNA               | 1.0 M KOH        | 190                                   | 34.7                                 | 5                |
| Fe <sup>2+</sup> -NiFe-LDH                              | 1.0 M KOH        | 195                                   | 40.3                                 | 6                |
| Ultrathin LDH                                           | 1.0 M KOH        | 210                                   | 31                                   | 7                |
| MoS <sub>2</sub> /NiFe-LDH                              | 1.0 M KOH        | 210                                   | 46                                   | 8                |
| Fe <sub>0.5</sub> Ni <sub>0.5</sub> @N-GR               | 1.0 M KOH        | 210                                   | 62                                   | 9                |
| WC <sub>x</sub> -FeNi                                   | 1.0 M KOH        | 211                                   | 56                                   | 10               |
| NiFe LDH@NiCoP/NF                                       | 1.0 M KOH        | 220                                   | 88.2                                 | 11               |
| NiFe/(NiFe) <sub>3</sub> S <sub>2</sub>                 | 1.0 M KOH        | 224                                   | 46                                   | 12               |
| NiFeMo-N <sub>2</sub>                                   | 1.0 M KOH        | 226                                   | 26.7                                 | 13               |
| hcp-NiFe@NC                                             | 1.0 M KOH        | 226                                   | 41                                   | 14               |
| NiFe-NFF                                                | 1.0 M KOH        | 227                                   | 38.9                                 | 15               |
| NiFe-LDH/MXene/NF                                       | 1.0 M KOH        | 229                                   | 44                                   | 16               |
| MIL-53(FeNi)/NF                                         | 1.0 M KOH        | 233                                   | 31.3                                 | 17               |
| Ni <sub>2</sub> Fe <sub>1</sub> @PANI-KOH900            | 1.0 M KOH        | 240                                   | 82                                   | 18               |
| Ni <sub>2</sub> -Fe <sub>1</sub> -O                     | 1.0 M KOH        | 244                                   | 39                                   | 19               |
| DR-Ni <sub>3</sub> FeN/N-G                              | 1.0 M KOH        | 250                                   | 38                                   | 20               |
| LDH-UF                                                  | 1.0 M KOH        | 254                                   | 32                                   | 21               |
| NiFe <sub>x</sub> /NiFe <sub>2</sub> O <sub>4</sub> @NC | 1.0 M KOH        | 262                                   | 51.4                                 | 22               |
| Ni SAs/Fe-NiOOH                                         | 1.0 M KOH        | 269                                   | 33.4                                 | 23               |
| NiFeCr-6:2:1                                            | 1.0 M KOH        | 280                                   | 130                                  | 24               |

## References

1. B. Zhang, K. Jiang, H. Wang and S. Hu, *Nano Lett.*, 2019, **19**, 530–537.
2. P. Zhang, L. Li, D. Nordlund, H. Chen, L. Fan, B. Zhang, X. Sheng, Q. Daniel and L. Sun, *Nat. Commun.*, 2018, **9**, 381.
3. G. Chen, Y. Zhu, H. M. Chen, Z. Hu, S. F. Hung, N. Ma, J. Dai, H. J. Lin, C. T. Chen, W. Zhou and Z. Shao, *Adv. Mater.*, 2019, **31**, 1900883.
4. R. Yang, Y. Zhou, Y. Xing, D. Li, D. Jiang, M. Chen, W. Shi and S. Yuan, *Appl. Catal. B*, 2019, **253**, 131–139.
5. C. Liang, P. Zou, A. Nairan, Y. Zhang, J. Liu, K. Liu, S. Hu, F. Kang, H. J. Fan and C. Yang, *Energy Environ. Sci.*, 2020, **13**, 86–95.
6. Z. Cai, D. Zhou, M. Wang, S. M. Bak, Y. Wu, Z. Wu, Y. Tian, X. Xiong, Y. Li, W. Liu, S. Siahrostami, Y. Kuang, X. Q. Yang, H. Duan, Z. Feng, H. Wang and X. Sun, *Angew. Chem., Int. Ed.*, 2018, **57**, 9392.
7. C. Kuai, Y. Zhang, D. Wu, D. Sokaras, L. Mu, S. Spence, D. Nordlund, F. Lin and X.-W. Du, *ACS Catal.*, 2019, **9**, 6027.
8. P. Xiong, X. Zhang, H. Wan, S. Wang, Y. Zhao, J. Zhang, D. Zhou, W. Gao, R. Ma, T. Sasaki and G. Wang, *Nano Lett.*, 2019, **19**, 4518.
9. P. Liu, D. Gao, W. Xiao, L. Ma, K. Sun, P. Xi, D. Xue and J. Wang, *Adv. Funct. Mater.*, 2018, **28**, 1706928.
10. S. Li, B. Chen, Y. Wang, M.-Y. Ye, P. A. v. Aken, C. Cheng and A. Thomas, *Nat. Mater.*, 2021, **20**, 1240–1247.
11. H. Zhang, X. Li, A. Hähnel, V. Naumann, C. Lin, S. Azimi, S. L. Schweizer, A. W. Maijenburg and R. B. Wehrspohn, *Adv. Funct. Mater.*, 2018, **28**, 1706847.
12. C. T. Hsieh, X. F. Chuah, C. L. Huang, H. W. Lin, Y. A. Chen and S. Y. Lu, *Small Methods*, 2019, **3**, 1900234.
13. B. C. Moon, W. H. Choi, K. H. Kim, D. G. Park, J. W. Choi and J. K. Kang, *Small*, 2019, **15**, 1804764.
14. C. Wang, H. Yang, Y. Zhang and Q. Wang, *Angew. Chem., Int. Ed.*, 2019, **58**, 6099.
15. C. Cao, D. D. Ma, Q. Xu, X. T. Wu and Q. L. Zhu, *Adv. Funct. Mater.*, 2019, **29**, 1807418.
16. M. Yu, Z. Wang, J. Liu, F. Sun, P. Yang and J. Qiu, *Nano Energy*, 2019, **63**, 103880.
17. F. Sun, G. Wang, Y. Ding, C. Wang, B. Yuan and Y. Lin, *Adv. Energy Mater.*, 2018,

- 8**, 1800584.
18. J. Zhang, M. Zhang, L. Qiu, Y. Zeng, J. Chen, C. Zhu, Y. Yu and Z. Zhu, *J. Mater. Chem. A*, 2019, **7**, 19045.
  19. C. Dong, T. Kou, H. Gao, Z. Peng and Z. Zhang, *Adv. Energy Mater.*, 2018, **8**, 1701347.
  20. S. Zhao, M. Li, M. Han, D. Xu, J. Yang, Y. Lin, N.-E. Shi, Y. Lu, R. Yang, B. Liu, Z. Dai and J. Bao, *Adv. Funct. Mater.*, 2018, **28**, 1706018.
  21. Y. Zhao, X. Zhang, X. Jia, G. I. N. Waterhouse, R. Shi, X. Zhang, F. Zhan, Y. Tao, L.-Z. Wu, C.-H. Tung, D. O'Hare and T. Zhang, *Adv. Energy Mater.*, 2018, **8**, 1703585.
  22. J. Zhao, X. Zhang, M. Liu, Y.-Z. Jiang, M. Wang, Z.-Y. Li and Z. Zhou, *J. Mater. Chem. A*, 2019, **7**, 21338.
  23. H. Liu, X. Xu, H. Xu, S. Wang, Z. Niu, Q. Jia, L. Yang, R. Gao, L. Zheng and D. Gao, *Appl. Catal. B*, 2021, **297**, 120451.
  24. Y. Yang, L. Dang, M. J. Shearer, H. Sheng, W. Li, J. Chen, P. Xiao, Y. Zhang, R. J. Hamers and S. Jin, *Adv. Energy Mater.*, 2018, **8**, 1703189.
